# Supplementary material
Source: Research Square preprint supplement (doi:10.21203/rs.3.rs-9136139/v1)
Supplement: Supplementary file 1 [file 884264da77fb11fc049450e0.xlsx]

## Sheet: Dataset
ID	Start time	Completion time	Email	Name	Last modified time	Name of the Quality Assurance Agency:	Country:	Operation Area:	Does your organization currently integrate AI into its operations?	Are there strategic plans for AI implementation in the near future?	Are there any existing or forthcoming regulatory frameworks or institutional policies that govern AI deployment in managerial, core, or supporting operational processes? If such documents are avai...	Are there any existing or forthcoming regulatory frameworks or institutional policies that govern AI deployment in managerial, core, or supporting operational processes? If such documents are avai...2	We kindly request you to elaborate on the key factors and underlying rationale that influenced your organization’s decision to implement AI in its operations.	Please specify organizational processes in which AI is currently deployed or planned for future implementation, including both internal organizational and analytical/data-driven processes (data co...	In what ways AI is integrated into administrative processes (for example, preparing board meeting minutes, using a Chatbot, etc.), and what are its implications for managerial, core, and supportin...	what are the key barriers/challenges associated with the adoption and utilization of AI within your organization, particularly in relation to technological, financial, legal, and other relevant fa...	How AI is integrated in the roles, responsibilities, and workflows of employees within your organization? To what extent has the adoption of AI been embraced by the employees, and what is their as...	To what extent has the integration of AI been substantiated in terms of its operational efficacy? In which specific areas or operational processes is its benefit most prominently manifested?
1	2025-04-08 16:32:42	2025-04-08 16:36:10	anonymous			AQ Austria	Austria	1. National;2. European;	2. No	1. Yes		AQ Austria has not yet developed any regulations or policies regardin use of AI. Plan is to have them until end of 2025. Should cover internal usage but also external usage, especially by peers.
2	2025-04-09 11:42:30	2025-04-09 11:52:44	anonymous			Polish Accreditation Committee (PKA)	Poland	1. National;	2. No	2. No
3	2025-04-09 14:00:06	2025-04-09 14:20:50	anonymous			ACCUEE	Spain - Canary Island	1. National;	1. Yes		The ACCUEE currently only applies AI in one process that is outside the ESG scopus, namely in the Diagnostic Assessment. ACCUEE evaluates the entire education system in the Canary Islands.Attached is a link to the webinar in which we explain the experience: https://youtu.be/wR1ozdofepI?si=-WQAtQFNp1W6rbkX		Diagnostic evaluations are census-based for all Canarian pupils in the 4th year of Primary and 2nd year of Secondary, which implies a large number of pupils. The ACCUEE has digitised these tests to facilitate the process and has commissioned the study of the correction of certain items with AI.	ACCUEE has a wide deployment of its own and Canarian Government applications for process management, but AI is currently only applied in the process described above (outside the ESG).	The use of AI in the processes described in the question are not part of ACCUEE protocols but may be used by staff.	The ACCUEE is aware of the importance of AI development and is training on the subject, but when it comes to the implementation of AI in ESG processes it is choosing to be cautious.	The ACCUEE has not conducted any internal study of the use of AI by its staff.	As the shared webinar shows, the experience is positive, but I repeat, we are being cautious in its institutional application in ESG-related processes.
4	2025-04-14 12:24:44	2025-04-14 12:25:47	anonymous			Aragon Agency for Quality Assurance and Strategic Foresight in Higher Education (ACPUA)	Spain	1. National;	2. No	2. No
5	2025-04-14 20:18:31	2025-04-14 20:19:04	anonymous			AQAS e.V.	Germany	1. National;2. European;	2. No	2. No
6	2025-04-15 12:31:13	2025-04-15 12:49:11	anonymous			ANECA (National Agency for Quality Assessment and Accreditation )	Spain	1. National;	2. No	2. No
7	2025-04-15 17:44:29	2025-04-15 17:51:09	anonymous			The Romanian Agency for Quality Assurance in Higher Education (ARACIS)	Romania	1. National;2. European;	2. No	1. Yes		For the moment, there are several ongoing initiatives and considerations regarding the regulation of AI in higher education within Romania. ARACIS is involved in ensuring quality standards in higher education, and while it does not have specific AI deployment regulations at this moment, it is engaged in quality assurance discussions that may soon encompass AI technologies. At this moment ARACIS i…
8	2025-04-16 12:10:59	2025-04-16 12:14:42	anonymous			QQI	Ireland	1. National;	2. No	1. Yes		We are currently piloting the use of AI in organisational life / work through a select number of staff / business areas. An overarching policy has yet to be developed.
9	2025-04-16 14:39:33	2025-04-16 14:42:19	anonymous			AVAP (Valencian Agency for Assessment and Forecasting)	Spain	1. National;	2. No	1. Yes		We do not know if such regulatory frameworks exist.
10	2025-04-16 16:04:50	2025-04-16 17:04:43	anonymous			SQAA	Slovenia	1. National;	1. Yes		They are not yet available in our country		Improvement of procedures, taking the burden of work from colleges, help in analytical work	processing and analysis	Help frpm CHAT GTP. Currently we are developing a Chatbot	legal, but also some technological issues (using CHAT with people that are not employed at agency)	We are still in process of implementing it.	Chat bot - hellp on our website for users and HEI
11	2025-04-17 10:47:13	2025-04-17 12:53:54	anonymous			Estonian Quality Agency for Education (HAKA)	Estonia	1. National;2. European;	1. Yes		No, but guidelines are under the development.		The use of AI can significantly make some processes more effective and effcient. It can save time and resources.	For now, we have mostly used AI for the brainstorming the ideas and getting inspiration, seach for information, analysis of data - compiling summaries of documents, for instance. Also for translation of the documents. Text editing, creative writing, and visual content creation for marketing purposes.	Preparing councils` and working groups` decisions and minutes, but not in a systematic way yet. It is still in a piloting phase.	There is no strategy in place yet. We are about to analyse the possibilities and risks related to the use of AI in the work of the agency. One risk that we have identified is related to inputting personal data into the system. We strive to prevent this. For instance, DeepSeek utilizes query data to train its language model.	For now, the use of AI has been mostly on ad hoc bases depending on the will and interest of the employee. There has been possibilities to participate on various trainings and seminars as well as share good practices among colleagues. Some of the colleagues participate in the Quality Management training and their development project is about mapping of possibilities of AI in the workflow of a qua…	While we clearly recognize the potential, we have not yet adopted a systematic approach. It performs well in handling repetitive and routine tasks, technical work, and translation.
12	2025-04-17 18:04:02	2025-04-17 18:04:55	anonymous			ANVUR	Italy	2. European;	2. No	2. No
13	2025-04-22 16:43:19	2025-04-22 17:39:21	anonymous			Norwegian Agency for Quality Assurance in Education (NOKUT)	Norway	1. National;	1. Yes		There are a number of national policy documents and strategies on the topic, that are specifically relevant for NOKUT as part of the public administration: https://www.regjeringen.no/en/topics/public-administration/ict-policy/id1367/. We also have internal regulations (they can, however not be shared externally).		1. Expecation by the Norwegian Government that within 2030 all public authorities have included the use of AI in their operations. 2. Additional funds from the Ministry of Education and Research to use AI in selected NOKUT tasks. 3. Motivation to keep up to date with the latest technological developments 4. Better data usage and more effective organizational and individual work performance	Implementing Microsoft Copilot for all emlployees. Earlier usage of AI in National Student Survey. In the future use of AI in accreditation and quality assurance of higher tertiary education. Current use of AI in thematic analysis of NOKUTs periodic review cycle from 2017-2024.	At this stage use of AI more on a exploratory and individual level when it comes to daily administrative processes.	One of major issues is data privacy. It is, for instance, not allowed to use Chat GPT for work, but only the licensed version of MS copilot.	The initital response of those who use it currently to explore its functions is positive (MS copilot). It appears to be a good assistent for writing and summarizing.	Mostly with regards to data analysis (for instance National Student Survey).
14	2025-04-23 12:12:10	2025-04-23 12:20:18	anonymous			Balearic Agency for Quality Assurance in Higher Education (AQUIB)	Spain	1. National;	1. Yes		No, there aren't		Basically we use AI to save time in rutinary and non-important operations, like social media content, news, summarize large texts, etc.	Basically we use AI to save time in rutinary and non-important operations, like social media content, news, summarize large texts, etc.	For the moment we don't use AI for that, but we are planning to explore some basic uses in administrative operations.	We see AI as a tool, and the main barrier is the lack of expertise with this too. Therefore, for the moment we are training and learning how to use it, and starting to use it in minor tasks to get confident with it.	Of 8 employees, only 2 use it regularly. Others are reticent to use it and others lack the knowledge, for the momet.	At a very basic level, for the moment.
15	2025-04-23 11:57:48	2025-04-23 12:52:35	anonymous			German Accreditation Council	Germany	1. National;	2. No	2. No
16	2025-04-23 13:57:59	2025-04-23 14:26:45	anonymous			NOKUT (Norwegian Agency for Quality Assurance in Education)	Norway	1. National;	1. Yes		https://www.regjeringen.no/no/tema/statlig-forvaltning/it-politikk/KI-strategi/id2639883/ https://www.nokut.no/en/about-nokut/development-strategy-20232030/		To streamline our various quality tools and open up new opportunities to increase the quality of our quality work.	Our various digitalisation processes are important for developing more structured data in all our different quality tools. Structural data is a prerequisite for performing statistical analyses and using artificial intelligence. We use of AI to screen out incomplete applications for accreditation to streamline our work, and we use AI for various forms of text analyses and summaries. (E.G. Free tex…	We use transcripts and summarization.	Security and keeping information safe.	NOKUT has established a separate digitalisation committee to look at needs, strategies and challenges related to digitalisation and the use of AI tools in our different work processes. Overall, it is becoming more and more relevant to have integrated systems that ‘communicate’ with each other, i.e., that relevant data about HE can flow ‘smoothly’ in the sector... Another key question is: who owns…	Takes time to build a repertoire and make people comfertable to use it.
17	2025-04-23 16:05:40	2025-04-23 16:06:45	anonymous			Agency for Science and Higher Education	Croatia	1. National;2. European;	2. No	2. No
18	2025-04-23 16:14:46	2025-04-23 16:15:27	anonymous			AAQ	Switzerland	1. National;2. European;	2. No	1. Yes		none
19	2025-04-24 13:38:24	2025-04-24 13:43:24	anonymous			ZEvA	Germany	2. European;	1. Yes		No		We need to streamline our processes to work more efficiently, and AI could help us with that.	Textual analysis of self-reports.	So far, we do not use it for administrative purposes.	Data protection and competency in the use of AI. We just started using the Adobe AI assistant, because it does not use internal data to train its AI and does not send internal data to an external server. We would not use an AI that uses our data publicly.	We are in the testing stages, and so far, three employees are testing the AI.	We are just testing it right now, but we want to use it mainly to assist our external QA procedures.
